# Supplementary material
Source: PubMed Central journal article supplement (PMC3609123)
Supplement: prio-7-151-s01.pdf [file prio-7-151-s01.pdf]

## **Supplemental Material to:**

**Dujduan Waraho-Zhmayev, Lizeta Gkogka, Ta-Yi Yu and  
Matthew P. DeLisa**

**A microbial sensor for discovering structural probes of  
protein misfolding and aggregation**

**Prion 2013; 7(2)**

**<http://dx.doi.org/10.4161/pri.23328>**

**<http://www.landesbioscience.com/journals/prion/article/23328/>**

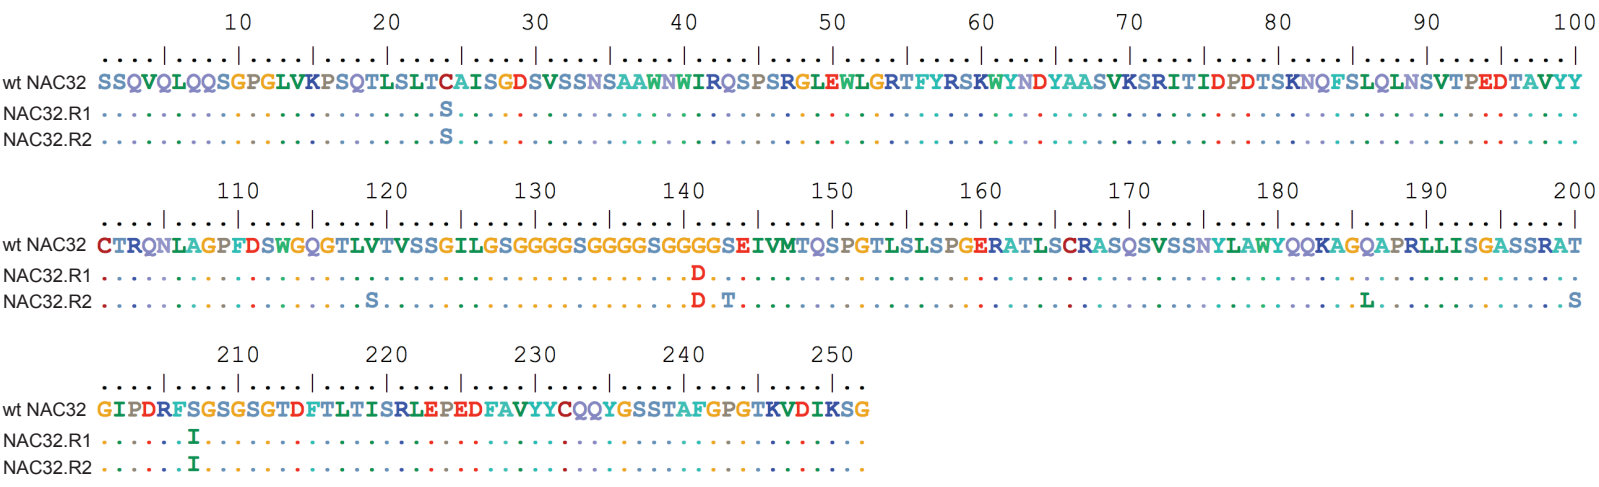

Supplemental Figure S1. Waraho-Zhmayev et al.

**Supplemental Figure S1. Amino acid sequences of anti- $\alpha$ -syn intrabodies.** Sequences for the NAC32.R1 and NAC32.R2 clones isolated from rounds 1 and 2, respectively, are aligned with the sequence for wt NAC32. The wt NAC32 sequence was the parent scFv used for the random mutagenesis library and was described previously (Lynch et al., 2008).
